# Supplementary material for: A Single Nucleotide Polymorphism in Catalase Is Strongly Associated with Ovarian Cancer Survival
Source: PubMed Central journal article supplement (PMC4547699; doi:10.1371/journal.pone.0135739), 2015-08-24
Supplement: pone.0135739.s001.pdf [file pone.0135739.s001.pdf]

| Patient number | Family History of Breast Cancer | Family history of ovarian cancer | Stage | histology  | Cancer recurrence | Family History of BRCA | Grade | Other Cancer                      | Lung Cancer | Colon Cancer | Blood Cancer | Prostate Cancer | Gastric Cancer | Skin Cancer | Pancreas Cancer |
|----------------|---------------------------------|----------------------------------|-------|------------|-------------------|------------------------|-------|-----------------------------------|-------------|--------------|--------------|-----------------|----------------|-------------|-----------------|
| 74             | Yes                             | No                               | N/A   | N/A        | N/A               | Yes                    | N/A   | HL, Leukemia, Prostate,           |             | No           | Yes          | Yes             | No             | No          | No              |
| 75             | Yes                             | Yes                              | N/A   | N/A        | N/A               | Yes                    | N/A   | Lung                              | Yes         | No           | No           | No              | No             | No          | No              |
| 76             | Yes                             | Yes                              | IIA   | serous     | Yes               | Yes                    | High  | No                                | No          | No           | No           | No              | No             | No          | No              |
| 77             | Yes                             | Yes                              | IIB   | serous     | Yes               | No                     | High  | Endometrial, colon                |             | Yes          | No           | No              | No             | No          | No              |
| 78             | Yes                             | No                               | N/A   | N/A        | N/A               | No                     | N/A   | HEENT                             | No          | No           | No           | No              | No             | No          | No              |
| 79             | Yes                             | Yes                              | IIIC  | serous     | No                | No                     | High  | No                                | No          | No           | No           | No              | No             | No          | No              |
| 80             | Yes                             | Yes                              | IIA   | Clear cell |                   | No                     | ?     | Kidney, cervix, leukemia          |             | No           | Yes          | No              | No             | No          | No              |
| 81             | Yes                             | Yes                              | IV    | serous     |                   | No                     | High  | Cervix, colon, leukemia brain     |             | Yes          | Yes          | No              | No             | No          | No              |
| 82             | Yes                             | No                               | N/A   | N/A        | N/A               | No                     | N/A   | N/A                               | N/A         | N/A          | N/A          | N/A             | N/A            | N/A         | N/A             |
| 83             | Yes                             | Yes                              | IIIC  | serous     | Yes               | No                     | High  | Lung, melanoma, colon             | Yes         | Yes          | No           | No              | No             | Yes         | No              |
| 84             | Yes                             | Yes                              | IIIC  | serous     | Yes               | No                     | High  | Lung, Leukemia                    | Yes         | No           | Yes          | No              | No             | No          | No              |
| 85             | Yes                             | No                               | N/A   | N/A        | N/A               | No                     | N/A   | No                                | No          | No           | No           | No              | No             | No          | No              |
| 86             | Yes                             | Yes                              | IIC   | serous     | No                | No                     | N/A   | Pancreas                          | No          | No           | No           | No              | No             | No          | Yes             |
| 87             | Yes                             | Yes                              | I     | serous     | No                | No                     | ?     | Pancreas, Prostate, Uterine, Skin |             | No           | No           | Yes             | No             | Yes         | Yes             |
| 88             | Yes                             | Yes                              | IC    | Serous     | No                | No                     | High  | Colon, ALL, MM                    | No          | Yes          | Yes          | No              | No             | No          | No              |
| 89             | Yes                             | No                               | N/A   | N/A        | N/A               | No                     | N/A   | No                                | No          | No           | No           | No              | No             | No          | No              |
| 90             | Yes                             | Yes                              | IIIC  | serous     | Yes               | Yes                    | High  | N/A                               | N/A         | N/A          | N/A          | N/A             | N/A            | N/A         | N/A             |
| 91             | Yes                             | Yes                              | N/A   | N/A        | N/A               | Yes                    | N/A   | No                                | No          | No           | No           | No              | No             | No          | No              |
| 92             | Yes                             | Yes                              | N/A   | N/A        | N/A               | No                     | N/A   | Bladder, Pancreas                 |             | No           | No           | No              | No             | No          | Yes             |
| 93             | Yes                             | Yes                              | IIIC  | Serous     | No                | Yes                    | High  | No                                | No          | No           | No           | No              | No             | No          | No              |
| 94             | Yes                             | Yes                              | N/A   | N/A        | N/A               | No                     | N/A   | Gastric, pancreas                 | No          | No           | No           | No              | Yes            | No          | Yes             |
| 95             | Yes                             | Yes                              | IIIC  | serous     | Yes               | No                     | High  | Gastric, colon                    | No          | Yes          | No           | No              | Yes            | No          | No              |
| 96             | Yes                             | Yes                              | N/A   | N/A        | N/A               | No                     | N/A   | Lung                              | Yes         | No           | No           | No              | No             | No          | No              |
| 97             | Yes                             | No                               | N/A   | N/A        | N/A               | No                     | N/A   | CLL                               | No          | No           | Yes          | No              | No             | No          | No              |
| 98             | No                              | Yes                              | N/A   | N/A        | N/A               | Yes                    | N/A   | No                                | No          | No           | No           | No              | No             | No          | No              |
| 99             | No                              | No                               | N/A   | N/A        | N/A               | N/A                    | N/A   | N/A                               | N/A         | N/A          | N/A          | N/A             | N/A            | N/A         | N/A             |
| 100            | No                              | Yes                              | IIIC  | serous     | Yes               | No                     | High  | Lung, colon                       | Yes         | Yes          | No           | No              | No             | No          | No              |
| 101            | Yes                             | Yes                              | N/A   | N/A        |                   | No                     | N/A   | Liver, Cervix, Brain, Spine       |             | No           | No           | No              | No             | No          | No              |

| Patient number | Family History of Breast Cancer | Family history of ovarian cancer | Stage   | histology | Cancer recurrence | Family History of BRCA | Grade   | Other Cancer                                           | Lung Cancer | Colon Cancer | Blood Cancer | Prostate Cancer | Gastric Cancer | Skin Cancer | Pancreas Cancer |
|----------------|---------------------------------|----------------------------------|---------|-----------|-------------------|------------------------|---------|--------------------------------------------------------|-------------|--------------|--------------|-----------------|----------------|-------------|-----------------|
| 102            | Yes                             | Yes                              | Missing | Missing   |                   | No                     | missing | Cervix, Pancreas                                       |             | No           | No           | No              | No             | No          | Yes             |
| 103            | Yes                             | Yes                              | N/A     | N/A       | N/A               | No                     | N/A     | Pancreas, Prostate                                     |             | No           | No           | Yes             | No             | No          | Yes             |
| 104            | Yes                             | Yes                              | N/A     | N/A       | N/A               | No                     | N/A     | Colon, Prostate,MM                                     |             | Yes          | Yes          | Yes             | No             | No          | No              |
| 105            | No                              | Yes                              | IIIC    | serous    | Yes               | No                     | High    | Colon,Bladder, Lung,Uterus, Skin                       | Yes         | Yes          | No           | No              | No             | Yes         | No              |
| 106            | Yes                             | Yes                              | N/A     | N/A       | N/A               | No                     | N/A     | Colon, Lung, HEENT, Bladder                            | Yes         | Yes          | Yes          | No              | No             | No          | No              |
| 107            | Yes                             | No                               | N/A     | N/A       | N/A               | No                     | N/A     | Prostate, thyroid,cervix, HEENT                        | No          | No           | No           | Yes             | No             | No          |                 |
| 108            | Yes                             | No                               | N/A     | N/A       | N/A               | No                     | N/A     | Prostate, thyroid,cervix, HEENT,skin                   | No          | No           | No           | Yes             | No             | Yes         |                 |
| 109            | Yes                             | Yes                              | N/A     | N/A       | N/A               | No                     | N/A     | Prostate, skin, thyroid,HEENT, Gastric, Blood,, cervix |             |              | Yes          | Yes             | Yes            | Yes         | No              |
| 110            | Yes                             | No                               | N/A     | N/A       | N/A               | No                     | N/A     | Prostate, BCC_skin, thyroid,HEENT, Gastric, Blood,     |             |              | Yes          | No              | Yes            | Yes         | No              |
| 111            | Yes                             | No                               | N/A     | N/A       | N/A               | No                     | N/A     | Lymph                                                  | No          | No           | Yes          | No              | No             | No          | No              |
| 112            | Yes                             | Yes                              | N/A     | N/A       | N/A               | No                     | N/A     | Endometrial,Lung, Kidney,HL, Colon,Lymph, cervix       | Yes         | No           | No           | No              | No             | No          | No              |
| 113            | Yes                             | Yes                              | N/A     | N/A       | N/A               | No                     | N/A     | Colon,Lymph                                            |             | Yes          | Yes          | No              | No             | No          | No              |
| 114            | Yes                             | Yes                              | N/A     | N/A       | N/A               | Yes                    | N/A     | Colon,Lung                                             | Yes         | Yes          | No           | No              | No             | No          | No              |
| 115            | Yes                             | No                               | N/A     | N/A       | N/A               | No                     | N/A     | No                                                     | No          | No           | No           | No              | No             | No          | No              |
| 116            |                                 |                                  |         |           |                   |                        |         |                                                        |             |              |              |                 |                |             |                 |
| 117            | No                              | Yes                              | IIIC    | Serous    | Yes               | No                     | High    | No                                                     | No          | No           | No           | No              | No             | No          | No              |
| 118            | Yes                             | Yes                              | N/A     | N/A       | N/A               | No                     | N/A     | No                                                     | No          | No           | No           | No              | No             | No          | No              |
| 119            | Yes                             | Yes                              | N/A     | N/A       | N/A               | No                     | N/A     | No                                                     | No          | No           | No           | No              | No             | No          | No              |
| 120            | Yes                             | No                               | N/A     | N/A       | Lung, gastric,    | No                     | N/A     | No                                                     | No          | No           | No           | No              | No             | No          | No              |
| 121            | Yes                             | No                               | N/A     | N/A       | N/A               | Yes                    | N/A     | No                                                     | No          | No           | No           | No              | No             | No          | No              |
| 122            | Yes                             | No                               | N/A     | N/A       | N/A               | No                     | N/A     | Lung, Skin, Liver                                      | Yes         | No           | No           | No              | No             | Yes         | No              |



| Cervix Cancer | Uterus Cancer | Thyroid Cancer | Bladder Cancer | Kidney Cancer | Liver Cancer | Testes Cancer | Sarcoma Cancer | Esophagous Cancer | Spine Cancer | Brain Cancer | Head&Neck Cancer | rs1001179 (CAT) | rs1002149 (GSR) | rs11549465 (HIF1a) | rs2243828 (MPO) |
|---------------|---------------|----------------|----------------|---------------|--------------|---------------|----------------|-------------------|--------------|--------------|------------------|-----------------|-----------------|--------------------|-----------------|
| N/A           | N/A           | N/A            | N/A            | N/A           | N/A          | N/A           | N/A            | N/A               | N/A          | N/A          | N/A              | C/C             | G/G             | C/C                | A/A             |
| N/A           | N/A           | N/A            | N/A            | N/A           | N/A          | N/A           | N/A            | N/A               | N/A          | N/A          | N/A              | C/T             | G/G             | C/C                | A/G             |
| No            | No            | No             | No             | No            | No           | No            | No             | No                | No           | No           | No               | C/C             | G/T             | C/T                | A/A             |
| No            | No            | No             | No             | No            | No           | No            | No             | No                | No           | No           | No               | C/C             | UND             | T/T                | A/A             |
| No            | No            | No             | No             | No            | No           | No            | No             | No                | No           | No           | No               | C/C             | G/G             | C/C                | A/A             |
| No            | No            | No             | No             | No            | No           | No            | No             | No                | No           | No           | No               | C/T             | G/T             | C/C                | A/A             |
| Missing       | Missing       | Missing        | Missing        | Missing       | Missing      | Missing       | Missing        | Missing           | Missing      | Missing      | Missing          | C/C             | G/G             | C/C                | A/G             |
| Missing       | Missing       | Missing        | Missing        | Missing       | Missing      | Missing       | Missing        | Missing           | Missing      | Missing      | Missing          | C/C             | UND             | C/C                | A/A             |
| N/A           | N/A           | N/A            | N/A            | N/A           | N/A          | N/A           | N/A            | N/A               | N/A          | N/A          | N/A              | C/C             | G/G             | C/C                | A/G             |
| No            | No            | No             | No             | No            | No           | No            | No             | No                | No           | No           | No               | C/T             | UND             | C/C                | A/A             |
| No            | No            | No             | No             | No            | No           | No            | No             | No                | No           | No           | No               | C/C             | G/T             | C/T                | A/A             |
| No            | No            | No             | No             | No            | No           | No            | No             | No                | No           | No           | No               | C/T             | G/G             | C/C                | A/A             |
| No            | No            | No             | No             | No            | No           | No            | No             | No                | No           | No           | No               | C/C             | G/G             | C/C                | A/A             |
| Missing       | Missing       | Missing        | Missing        | Missing       | Missing      | Missing       | Missing        | Missing           | Missing      | No           | No               | C/T             | G/G             | C/C                | A/A             |
| No            | No            | No             | No             | No            | No           | No            | No             | No                | No           | No           | No               | C/T             | G/G             | C/C                | A/G             |
| No            | No            | No             | No             | No            | No           | No            | No             | No                | No           | No           | No               | C/C             | G/G             | C/C                | A/G             |
| Missing       | Missing       | Missing        | Missing        | No            | No           | No            | No             | No                | No           | No           | No               | C/C             | G/G             | C/C                | A/A             |
| No            | No            | No             | No             | No            | No           | No            | No             | No                | No           | No           | No               | C/T             | G/G             | C/C                | A/A             |
| No            | No            | No             | No             | No            | No           | No            | No             | No                | No           | No           | No               | C/T             | G/G             | C/T                | A/A             |
| No            | No            | No             | No             | No            | No           | No            | No             | No                | No           | No           | No               | C/T             | G/T             | C/C                | A/G             |
| No            | No            | No             | No             | No            | No           | No            | No             | No                | No           | No           | No               | C/C             | G/T             | C/C                | A/A             |
| No            | No            | No             | No             | No            | No           | No            | No             | No                | No           | No           | No               | C/C             | G/G             | C/C                | A/A             |
| N/A           | N/A           | N/A            | N/A            | N/A           | N/A          | N/A           | N/A            | N/A               | N/A          | N/A          | N/A              | C/C             | G/G             | C/T                | A/G             |
| No            | No            | Yes            | No             | yes           | No           | No            | No             | No                | No           | No           | No               | C/C             | G/T             | C/C                | G/G             |
| No            | No            | No             | No             | No            | No           | No            | No             | No                | No           | No           | No               | C/C             | G/G             | C/C                | A/A             |
| No            | No            | No             | No             | No            | No           | No            | No             | No                | No           | No           | No               | C/C             | G/G             | C/C                | A/A             |
| No            | No            | No             | No             | No            | No           | No            | No             | No                | No           | No           | No               | C/T             | G/G             | C/C                | A/A             |
| N/A           | N/A           | N/A            | N/A            | N/A           | N/A          | N/A           | N/A            | N/A               | N/A          | No           | No               | C/T             | G/G             | C/T                | A/A             |
| Missing       | Missing       | Missing        | Missing        | Missing       | Missing      | Missing       | Missing        | Missing           | Missing      | No           | No               | C/C             | G/G             | C/C                | A/A             |
| No            | No            | No             | No             | No            | No           | No            | No             | No                | No           | No           | No               | C/C             | G/T             | C/C                | A/A             |
| No            | No            | No             | No             | No            | No           | No            | No             | No                | No           | No           | No               | C/C             | G/G             | C/C                | A/A             |
| No            | No            | No             | No             | No            | No           | No            | No             | No                | No           | No           | No               | C/T             | G/G             | C/T                | A/G             |
| N/A           | N/A           | N/A            | N/A            | N/A           | N/A          | N/A           | N/A            | N/A               | N/A          | No           | No               | C/C             | G/T             | C/C                | A/A             |
| No            | No            | No             | No             | No            | No           | No            | No             | No                | No           | No           | No               | C/C             | UND             | C/C                | UND             |
| N/A           | N/A           | N/A            | N/A            | N/A           | N/A          | N/A           | N/A            | N/A               | N/A          | N/A          | N/A              | C/C             | G/G             | C/C                | A/A             |
| No            |               | Yes            | Yes            | Yes           | Yes          | Yes           | Yes            | Yes               | Yes          | No           | No               | C/C             | G/T             | C/C                | A/G             |
| No            | No            | No             | No             | No            | No           | No            | No             | No                | No           | No           | No               | C/C             | G/G             | C/C                | A/A             |
| No            | No            | No             | No             | No            | No           | No            | No             | No                | No           | No           | No               | C/T             | G/G             | C/C                | G/G             |

| Cervix Cancer | Uterus Cancer | Thyroid Cancer | Bladder Cancer | Kidney Cancer | Liver Cancer | Testes Cancer | Sarcoma Cancer | Esophagous Cancer | Spine Cancer | Brain Cancer | Head&Neck Cancer | rs1001179 (CAT) | rs1002149 (GSR) | rs11549465 (HIF1a) | rs2243828 (MPO) |
|---------------|---------------|----------------|----------------|---------------|--------------|---------------|----------------|-------------------|--------------|--------------|------------------|-----------------|-----------------|--------------------|-----------------|
| No            | No            | No             | No             | No            | No           | No            | No             | No                | No           | No           | No               | C/T             | G/G             | C/C                | A/G             |
| No            | No            | No             | No             | No            | No           | No            | No             | No                | No           | No           | No               | C/T             | G/T             | C/C                | A/G             |
| MISSING       | MISSING       | MISSING        | MISSING        | MISSING       | MISSING      | MISSING       | MISSING        | MISSING           | MISSING      | No           | No               | C/C             | G/G             | C/C                | A/A             |
| No            | No            | No             | No             | No            | No           | No            | No             | No                | No           | No           | No               | C/C             | G/G             | C/C                | A/A             |
| No            | No            | No             | No             | No            | No           | No            | No             | No                | No           | No           | No               | C/C             | G/G             | C/C                | A/A             |
| No            | No            | No             | No             | No            | No           | No            | No             | No                | No           | Yes          | No               | C/C             | G/G             | C/C                | A/G             |
| No            | No            | No             | No             | No            | No           | No            | No             | No                | No           | Yes          | No               | C/C             | G/T             | C/C                | A/A             |
| No            | No            | No             | No             | No            | No           | No            | No             | No                | No           | No           | No               | C/C             | G/G             | C/C                | A/A             |
| No            | No            | No             | No             | No            | No           | No            | No             | No                | No           | No           | No               | C/T             | G/G             | C/C                | A/A             |
| No            | No            | No             | No             | No            | No           | No            | No             | No                | No           | No           | No               | C/T             | G/G             | C/C                | A/A             |
| No            | No            | No             | No             | No            | No           | No            | No             | No                | No           | No           | No               | C/C             | UND             | C/C                | UND             |
| No            | No            | No             | No             | No            | No           | No            | No             | No                | No           | No           | No               | C/C             | UND             | C/T                | UND             |
| No            | No            | No             | No             | No            | Yes          | No            | No             | No                | No           | No           | No               | C/C             | G/G             | C/C                | A/G             |
| Missing       | Missing       | Missing        | Missing        | Missing       | Missing      | Missing       | Missing        | Missing           | Missing      | Missing      | Missing          | C/C             | G/G             | C/T                | A/A             |
| No            | No            | No             | No             | No            | No           | No            | No             | No                | No           | No           | No               | C/C             | G/T             | C/C                | A/G             |
| No            | No            | No             | No             | No            | No           | No            | No             | No                | No           | No           | No               | C/C             | G/T             | C/C                | A/G             |
| No            | No            | No             | No             | No            | No           | No            | No             | No                | No           | No           | No               | C/C             | G/G             | C/C                | A/A             |
| N/A           | N/A           | N/A            | N/A            | N/A           | N/A          | N/A           | N/A            | N/A               | N/A          | N/A          | N/A              | C/C             | G/G             | C/C                | A/A             |
| No            | No            | No             | No             | No            | No           | No            | No             | No                | No           | No           | No               | C/T             | G/G             | C/T                | A/G             |
| No            | No            | No             | No             | No            | No           | No            | No             | No                | No           | No           | No               | C/C             | G/G             | C/C                | A/A             |
| No            | No            | No             | No             | No            | No           | No            | No             | No                | No           | No           | No               | C/T             | G/G             | C/T                | A/G             |
| No            | No            | No             | No             | No            | No           | No            | No             | No                | No           | No           | No               | T/T             | G/G             | C/C                | A/G             |
| No            | No            | No             | No             | No            | No           | No            | No             | No                | No           | No           | No               | C/C             | T/T             | C/C                | A/A             |
| No            | No            | No             | No             | No            | No           | No            | No             | No                | No           | No           | No               | C/C             | G/G             | C/C                | A/A             |
| No            | No            | No             | No             | No            | No           | No            | No             | No                | No           | No           | No               | C/C             | G/G             | C/C                | A/A             |
| No            | No            | No             | No             | No            | No           | No            | No             | No                | No           | No           | No               | C/C             | G/G             | C/C                | A/A             |
| No            | No            | No             | No             | No            | No           | No            | No             | No                | No           | No           | No               | C/C             | G/T             | C/C                | A/A             |
| No            | No            | No             | No             | No            | No           | No            | No             | No                | No           | No           | No               | C/T             | G/G             | C/T                | A/A             |
| N/A           | No            | N/A            | N/A            | N/A           | N/A          | N/A           | N/A            | N/A               | N/A          | N/A          | N/A              | C/T             | G/G             | C/C                | G/G             |
| No            | No            | No             | No             | No            | No           | No            | Yes            | No                | No           | No           | No               | C/C             | T/T             | C/C                | A/A             |
| N/A           | N/A           | N/A            | N/A            | N/A           | N/A          | N/A           | N/A            | N/A               | N/A          | N/A          | N/A              | C/C             | G/G             | C/C                | A/A             |
| No            | No            | No             | No             | No            | No           | No            | No             | No                | No           | No           | No               | C/C             | G/G             | C/T                | A/A             |
| N/A           | No            | No             | No             | No            | No           | No            | No             | No                | No           | No           | No               | C/T             | G/T             | C/T                | A/A             |
| No            | No            | No             | No             | No            | No           | No            | No             | No                | No           | No           | No               | C/C             | G/G             | C/C                | A/A             |
| No            | No            | No             | No             | No            | No           | No            | No             | No                | No           | No           | No               | C/T             | G/T             | C/C                | A/A             |
| No            | No            | No             | No             | No            | No           | No            | No             | No                | No           | No           | No               | C/C             | G/G             | C/C                | G/G             |

| Cervix Cancer | Uterus Cancer | Thyroid Cancer | Bladder Cancer | Kidney Cancer | Liver Cancer | Testes Cancer | Sarcoma Cancer | Esophagous Cancer | Spine Cancer | Brain Cancer | Head&Neck Cancer | rs1001179 (CAT) | rs1002149 (GSR) | rs11549465 (HIF1a) | rs2243828 (MPO) |
|---------------|---------------|----------------|----------------|---------------|--------------|---------------|----------------|-------------------|--------------|--------------|------------------|-----------------|-----------------|--------------------|-----------------|
| No            | No            | No             | No             | No            | No           | No            | No             | No                | No           | No           | No               | C/T             | T/T             | C/T                | G/G             |
| No            | No            | No             | No             | No            | No           | No            | No             | No                | No           | No           | No               | C/T             | G/G             | C/C                | A/G             |
| No            | No            | No             | No             | No            | No           | No            | No             | No                | No           | No           | No               | C/T             | G/T             | C/C                | A/A             |
| No            | Yes           | No             | No             | No            | No           | No            | No             | No                | No           | No           | No               | C/T             | G/G             | C/C                | G/G             |
| No            | No            | No             | No             | No            | No           | No            | No             | No                | No           | No           | Yes              | C/C             | G/G             | C/C                | A/A             |
| No            | No            | No             | No             | No            | No           | No            | No             | No                | No           | No           | No               | C/T             | G/G             | C/C                | A/A             |
| Yes           | No            | No             | No             | Yes           | No           | No            | No             | No                | No           | No           | No               | C/C             | G/T             | C/C                | A/G             |
| Yes           | No            | No             | No             | No            | No           | No            | No             | No                | No           | Yes          | No               | C/C             | G/G             | C/C                | A/G             |
| N/A           | N/A           | N/A            | No             | No            | No           | No            | No             | No                | No           | No           | No               | C/T             | G/G             | C/C                | G/G             |
| No            | No            | No             | No             | No            | No           | No            | No             | No                | No           | No           | No               | C/T             | G/T             | C/T                | A/G             |
| No            | No            | No             | No             | No            | No           | No            | No             | No                | No           | No           | No               | C/T             | G/T             | C/T                | G/G             |
| No            | No            | No             | No             | No            | No           | No            | No             | No                | No           | No           | No               | C/T             | G/G             | C/C                | A/G             |
| No            | No            | No             | No             | No            | No           | No            | No             | No                | No           | No           | No               | C/C             | G/G             | C/T                | A/A             |
| No            | Yes           | No             | No             | No            | No           | No            | No             | No                | No           | No           | No               | C/C             | G/G             | C/C                | G/G             |
| No            | No            | No             | No             | No            | No           | No            | No             | No                | No           | No           | No               | C/C             | G/G             | C/C                | A/A             |
| No            | No            | No             | No             | No            | No           | No            | No             | No                | No           | No           | No               | C/C             | G/G             | C/C                | A/A             |
| N/A           | N/A           | N/A            | N/A            | No            | No           | No            | No             | No                | No           | No           | No               | C/T             | G/G             | C/C                | A/G             |
| No            | No            | No             | No             | No            | No           | No            | No             | No                | No           | No           | No               | C/C             | G/G             | C/C                | A/G             |
| No            | No            | No             | Yes            | No            | No           | No            | No             | No                | No           | No           | No               | C/C             | G/T             | C/C                | A/G             |
| No            | No            | No             | No             | No            | No           | No            | No             | No                | No           | No           | No               | C/T             | G/G             | C/C                | A/A             |
| No            | No            | No             | No             | No            | No           | No            | No             | No                | No           | No           | No               | C/C             | G/G             | C/T                | A/G             |
| No            | No            | No             | No             | No            | No           | No            | No             | No                | No           | No           | No               | T/T             | G/T             | C/C                | A/G             |
| No            | No            | No             | No             | No            | No           | No            | No             | No                | No           | No           | No               | C/C             | G/G             | C/C                | A/A             |
| No            | No            | No             | No             | No            | No           | No            | No             | No                | No           | No           | No               | C/C             | G/G             | C/C                | A/A             |
| No            | No            | No             | No             | No            | No           | No            | No             | No                | No           | No           | No               | C/C             | G/G             | C/C                | A/A             |
| N/A           | N/A           | N/A            | N/A            | N/A           | N/A          | N/A           | N/A            | N/A               | N/A          | N/A          | N/A              | C/T             | G/G             | C/C                | A/A             |
| No            | No            | No             | No             | No            | No           | No            | No             | No                | No           | No           | No               | C/C             | G/G             | C/C                | A/A             |
| Yes           | No            | No             | No             | No            | Yes          | No            | No             | No                | Yes          | Yes          | No               | C/C             | G/G             | C/C                | A/G             |



| Cervix Cancer | Uterus Cancer | Thyroid Cancer | Bladder Cancer | Kidney Cancer | Liver Cancer | Testes Cancer | Sarcoma Cancer | Esophagous Cancer | Spine Cancer | Brain Cancer | Head&Neck Cancer | rs1001179 (CAT) | rs1002149 (GSR) | rs11549465 (HIF1a) | rs2243828 (MPO) |
|---------------|---------------|----------------|----------------|---------------|--------------|---------------|----------------|-------------------|--------------|--------------|------------------|-----------------|-----------------|--------------------|-----------------|
| Yes           | No            | No             | No             | No            | No           | No            | No             | No                | No           | No           | No               | C/C             | G/G             | C/C                | A/A             |
| No            | No            | No             | No             | No            | No           | No            | No             | No                | No           | No           | No               | C/C             | G/G             | C/T                | A/G             |
| No            | No            | No             | No             | No            | No           | No            | No             | No                | No           | No           | No               | C/T             | G/G             | C/C                | A/A             |
| No            | Yes           | No             | Yes            | No            | No           | No            | No             | No                | No           | No           | No               | C/T             | G/T             | C/C                | A/A             |
| No            | Yes           | No             | Yes            | No            | No           | No            | No             | No                | No           | No           | Yes              | C/T             | G/G             | C/C                | A/A             |
| Yes           |               | No             | No             | No            | No           | No            | No             | No                | No           | No           | Yes              | C/C             | G/G             | C/T                | A/G             |
| Yes           |               | No             | No             | No            | No           | No            | No             | No                | No           | No           | Yes              | C/C             | G/G             | C/C                | A/A             |
| Yes           | No            | No             | No             | No            | No           | No            | No             | No                | No           | No           | Yes              | C/C             | G/G             | T/T                | A/G             |
| No            | No            | Yes            | Yes            | No            | No           | No            | No             | No                | No           | No           | Yes              | C/T             | G/G             | C/C                | A/G             |
|               |               | No             | No             | No            | No           | No            | No             | No                | No           | No           | No               | C/C             | UND             | C/C                | A/A             |
| No            | No            | No             | No             | Yes           | No           | No            | No             | No                | No           | No           | No               | C/C             | G/T             | C/C                | A/A             |
| Yes           | No            | No             | No             | No            | No           | No            | No             | No                | No           | No           | No               | C/C             | G/T             | C/T                | A/A             |
| No            | No            | No             | No             | No            | No           | No            | No             | No                | No           | No           | No               | C/C             | G/G             | C/C                | A/G             |
| No            | No            | No             | No             | No            | No           | No            | No             | No                | No           | No           | No               | C/T             | G/G             | C/C                | A/G             |
| No            | No            | No             | No             | No            | No           | No            | No             | No                | No           | No           | No               | C/C             | G/T             | C/C                | G/G             |
| No            | No            | No             | No             | No            | No           | No            | No             | No                | No           | No           | No               | C/C             | G/G             | C/C                | A/A             |
| No            | No            | No             | No             | No            | No           | No            | No             | No                | No           | No           | No               | C/C             | G/G             | C/C                | A/A             |
| No            | No            | No             | No             | No            | No           | No            | No             | No                | No           | No           | No               | C/C             | G/G             | C/C                | A/G             |
| No            | No            | No             | No             | No            | No           | No            | No             | No                | No           | No           | No               | C/C             | G/G             | C/C                | A/G             |
| No            | No            | No             | No             | No            | No           | No            | No             | No                | No           | No           | No               | C/T             | G/G             | C/C                | A/G             |
| No            | No            | No             | No             | No            | Yes          | No            | No             | No                | No           | No           | No               | C/C             | G/T             | C/C                | A/G             |

| Cervix Cancer | Uterus Cancer | Thyroid Cancer | Bladder Cancer | Kidney Cancer | Liver Cancer | Testes Cancer | Sarcoma Cancer | Esophagus Cancer | Spine Cancer | Brain Cancer | Head&Neck Cancer | rs1001179 (CAT) | rs1002149 (GSR) | rs11549465 (HIF1a) | rs2243828 (MPO) |
|---------------|---------------|----------------|----------------|---------------|--------------|---------------|----------------|------------------|--------------|--------------|------------------|-----------------|-----------------|--------------------|-----------------|
| No            | No            | No             | No             | No            | Yes          | No            | No             | No               | No           | No           | No               | C/T             | G/G             | C/C                | A/G             |
| No            | No            | No             | No             | No            | No           | No            | No             | No               | No           | No           | No               | C/C             | G/T             | C/C                | A/A             |
| Yes           | No            | No             | No             | No            | No           | No            | No             | No               | No           | No           | No               | C/C             | G/T             | C/C                | A/A             |
| No            | No            | No             | No             | No            | No           | No            | No             | No               | No           | No           | No               | C/C             | G/G             | C/C                | A/G             |
| No            | No            | No             | No             | No            | No           | No            | No             | No               | No           | No           | No               | C/C             | G/G             | C/C                | A/A             |
| No            | No            | No             | No             | No            | No           | No            | No             | No               | No           | Yes          | No               | C/C             | G/T             | C/C                | A/G             |
| No            | No            | No             | No             | No            | No           | No            | No             | No               | No           | No           | No               | C/C             | G/G             | C/T                | G/G             |
| No            | Yes           | No             | No             | No            | No           | No            | No             | No               | No           | No           | No               | C/C             | G/G             | C/C                | A/A             |
| No            | No            | No             | No             | No            | No           | No            | No             | No               | No           | No           | No               | C/T             | G/T             | C/T                | A/G             |
| No            | No            | No             | No             | No            | No           | No            | No             | No               | No           | No           | No               | C/C             | G/G             | C/C                | A/A             |
| No            | No            | No             | No             | No            | No           | No            | No             | No               | No           | No           | No               | T/T             | UND             | C/C                | G/G             |
| No            | No            | No             | No             | No            | No           | No            | No             | No               | No           | No           | No               | C/T             | G/G             | C/C                | A/A             |
| N/A           | N/A           | N/A            | N/A            | N/A           | N/A          | N/A           | N/A            | N/A              | N/A          | N/A          | N/A              | C/C             | G/G             | C/C                | A/A             |
| N/A           | N/A           | N/A            | N/A            | N/A           | N/A          | N/A           | N/A            | N/A              | N/A          | N/A          | N/A              | C/C             | G/G             | C/T                | A/A             |
| N/A           | N/A           | N/A            | N/A            | N/A           | N/A          | N/A           | N/A            | N/A              | N/A          | N/A          | N/A              | C/T             | G/G             | C/C                | A/A             |
| N/A           | N/A           | N/A            | N/A            | N/A           | N/A          | N/A           | N/A            | N/A              | N/A          | N/A          | N/A              | C/T             | G/G             | C/C                | A/A             |
| N/A           | N/A           | N/A            | N/A            | N/A           | N/A          | N/A           | N/A            | N/A              | N/A          | N/A          | N/A              | C/C             | G/T             | C/C                | A/G             |
| N/A           | N/A           | N/A            | N/A            | N/A           | N/A          | N/A           | N/A            | N/A              | N/A          | N/A          | N/A              | C/C             | G/G             | C/T                | A/A             |
| N/A           | N/A           | N/A            | N/A            | N/A           | N/A          | N/A           | N/A            | N/A              | N/A          | N/A          | N/A              | C/C             | G/G             | C/C                | A/A             |
| N/A           | N/A           | N/A            | N/A            | N/A           | N/A          | N/A           | N/A            | N/A              | N/A          | N/A          | N/A              | C/C             | G/T             | C/C                | A/A             |
| N/A           | N/A           | N/A            | N/A            | N/A           | N/A          | N/A           | N/A            | N/A              | N/A          | N/A          | N/A              | C/C             | G/G             | C/C                | A/A             |
| N/A           | N/A           | N/A            | N/A            | N/A           | N/A          | N/A           | N/A            | N/A              | N/A          | N/A          | N/A              | C/C             | G/G             | C/C                | A/A             |
| N/A           | N/A           | N/A            | N/A            | N/A           | N/A          | N/A           | N/A            | N/A              | N/A          | N/A          | N/A              | C/C             | G/G             | C/C                | A/G             |

| rs2297518<br>(iNOS) | rs3448<br>(GPX1) | rs4673<br>(CYBA) | rs4880<br>(MnSOD) | Survival<br>in months |
|---------------------|------------------|------------------|-------------------|-----------------------|
| G/G                 | C/C              | A/G              | T/C               | missing!              |
| A/G                 | C/T              | G/G              | T/T               | missing!              |
| G/G                 | T/T              | T/C              | A/G               | missing!              |
| A/G                 | T/T              | T/T              | G/G               | missing!              |
| G/G                 | C/C              | T/T              | G/G               | 288.00                |
| G/G                 | C/C              | C/C              | G/G               | missing!              |
| G/G                 | C/T              | UND              | A/G               | missing!              |
| A/A                 | C/C              | C/C              | A/G               | missing!              |
| G/G                 | C/T              | G/G              | T/C               | missing!              |
| G/G                 | C/C              | T/T              | A/G               | 60.00                 |
| A/G                 | C/C              | C/C              | G/G               | missing!              |
| G/G                 | C/C              | T/C              | A/A               | missing!              |
| G/G                 | C/T              | T/C              | A/G               | missing!              |
| A/G                 | C/C              | T/C              | A/G               | missing!              |
| G/G                 | T/T              | T/T              | A/A               | 60.00                 |
| G/G                 | T/T              | T/C              | A/G               | missing!              |
| G/G                 | C/T              | T/C              | G/G               | missing!              |
| G/G                 | C/C              | T/C              | A/G               | missing!              |
| G/G                 | C/C              | T/T              | A/G               | missing!              |
| G/G                 | C/C              | T/T              | A/A               | missing!              |
| G/G                 | C/T              | C/C              | A/G               | missing!              |
| G/G                 | C/T              | T/T              | A/A               | missing!              |
| G/G                 | C/C              | A/G              | T/T               | missing!              |
| G/G                 | C/T              | T/T              | A/A               | missing!              |
| G/G                 | C/C              | T/C              | G/G               | missing!              |
| A/A                 | C/C              | T/C              | A/G               | missing!              |
| A/G                 | C/C              | C/C              | A/G               | missing!              |
| A/G                 | C/T              | T/T              | G/G               | missing!              |
| G/G                 | C/T              | T/C              | A/A               | missing!              |
| A/G                 | C/T              | C/C              | A/G               | 708.00                |
| G/G                 | C/C              | T/C              | A/G               | missing!              |
| A/G                 | C/C              | T/T              | G/G               | missing!              |
| G/G                 | C/T              | T/T              | A/A               | 12.00                 |
| UND                 | UND              | UND              | A/A               | 96.00                 |
| A/G                 | C/C              | G/G              | T/C               | missing!              |
| G/G                 | C/T              | T/C              | G/G               | missing!              |
| G/G                 | C/T              | T/T              | A/A               | missing!              |
| A/G                 | C/T              | C/C              | G/G               | 12.00                 |

| rs2297518<br>(iNOS) | rs3448<br>(GPX1) | rs4673<br>(CYBA) | rs4880<br>(MnSOD) | Survival<br>in months |
|---------------------|------------------|------------------|-------------------|-----------------------|
| G/G                 | C/C              | T/T              | G/G               | missing!              |
| G/G                 | C/T              | T/C              | A/G               | 396.00                |
| G/G                 | C/C              | T/T              | A/G               | missing!              |
| G/G                 | C/T              | T/C              | A/G               | missing!              |
| G/G                 | C/C              | T/C              | A/G               | missing!              |
| A/G                 | C/C              | T/C              | G/G               | missing!              |
| G/G                 | C/C              | C/C              | A/G               | missing!              |
| G/G                 | C/C              | C/C              | A/G               | missing!              |
| A/A                 | C/C              | T/T              | A/G               | missing!              |
| G/G                 | C/T              | T/C              | A/A               | missing!              |
| UND                 | UND              | UND              | G/G               | 300.00                |
| G/G                 | C/T              | T/T              | A/G               | missing!              |
| G/G                 | C/C              | T/T              | A/G               | 108.00                |
| G/G                 | C/C              | T/C              | A/G               | missing!              |
| G/G                 | C/T              | C/C              | G/G               | 108.00                |
| G/G                 | C/C              | C/C              | A/G               | 36.00                 |
| A/G                 | C/C              | T/T              | A/A               | missing!              |
| A/G                 | C/C              | A/G              | T/C               | missing!              |
| A/A                 | C/T              | T/C              | G/G               | missing!              |
| A/G                 | C/C              | C/C              | A/A               | missing!              |
| G/G                 | C/C              | T/C              | G/G               | missing!              |
| G/G                 | C/C              | C/C              | A/G               | 60.00                 |
| A/G                 | C/C              | T/T              | G/G               | missing!              |
| G/G                 | C/C              | C/C              | G/G               | missing!              |
| G/G                 | C/C              | T/C              | G/G               | 24.00                 |
| G/G                 | C/C              | T/T              | A/G               | missing!              |
| A/G                 | C/C              | T/C              | G/G               | missing!              |
| G/G                 | C/C              | C/C              | A/G               | missing!              |
| G/G                 | C/T              | C/C              | A/G               | missing!              |
| A/G                 | C/T              | A/G              | T/C               | missing!              |
| G/G                 | C/C              | T/T              | A/A               | missing!              |
| G/G                 | C/C              | T/C              | A/G               | missing!              |
| G/G                 | C/C              | T/T              | G/G               | missing!              |
| G/G                 | C/C              | T/C              | A/G               | missing!              |
| G/G                 | C/T              | T/C              | A/G               | missing!              |

| rs2297518<br>(iNOS) | rs3448<br>(GPX1) | rs4673<br>(CYBA) | rs4880<br>(MnSOD) | Survival<br>in months |
|---------------------|------------------|------------------|-------------------|-----------------------|
| A/G                 | C/C              | C/C              | G/G               | missing!              |
| G/G                 | C/C              | T/C              | G/G               | missing!              |
| G/G                 | C/C              | T/C              | G/G               | missing!              |
| A/A                 | C/C              | T/C              | G/G               | missing!              |
| G/G                 | T/T              | T/T              | A/A               | missing!              |
| A/G                 | C/T              | T/T              | A/G               | 72.00                 |
| G/G                 | C/T              | T/C              | G/G               | missing!              |
| A/G                 | T/T              | T/T              | G/G               | 48.00                 |
| A/A                 | C/T              | T/C              | G/G               | missing!              |
| A/G                 | C/T              | T/C              | G/G               | 48.00                 |
| A/G                 | C/C              | T/C              | G/G               | missing!              |
| G/G                 | C/C              | T/C              | A/A               | missing!              |
| G/G                 | C/C              | C/C              | G/G               | missing!              |
| A/G                 | C/C              | T/C              | A/G               | missing!              |
| A/G                 | C/C              | T/C              | G/G               | missing!              |
| G/G                 | C/T              | T/T              | G/G               | missing!              |
| A/G                 | C/C              | C/C              | G/G               | 108.00                |
| G/G                 | C/T              | C/C              | A/G               | missing!              |
| G/G                 | C/C              | T/C              | A/A               | missing!              |
| G/G                 | C/T              | T/C              | A/G               | 72.00                 |
| G/G                 | C/C              | C/C              | A/G               | missing!              |
| A/G                 | C/C              | T/C              | G/G               | 60.00                 |
| G/G                 | C/T              | T/C              | A/G               | missing!              |
| G/G                 | C/T              | T/C              | A/G               | missing!              |
| A/G                 | C/C              | C/C              | A/G               | missing!              |
| G/G                 | C/C              | G/G              | T/C               | missing!              |
| G/G                 | C/C              | T/C              | A/G               | missing!              |
| G/G                 | C/C              | C/C              | A/A               | missing!              |

| rs2297518<br>(iNOS) | rs3448<br>(GPX1) | rs4673<br>(CYBA) | rs4880<br>(MnSOD) | Survival<br>in months |
|---------------------|------------------|------------------|-------------------|-----------------------|
| G/G                 | C/C              | T/C              | A/G               | missing!              |
| A/G                 | C/C              | T/C              | A/A               | missing!              |
| A/G                 | C/T              | C/C              | A/G               | missing!              |
| G/G                 | C/T              | C/C              | A/G               | missing!              |
| G/G                 | T/T              | T/T              | A/G               | missing!              |
| A/G                 | C/T              | C/C              | G/G               | missing!              |
| A/G                 | C/T              | C/C              | A/G               | missing!              |
| A/G                 | C/T              | C/C              | A/G               | missing!              |
| A/A                 | C/C              | T/C              | A/A               | missing!              |
| G/G                 | C/C              | C/C              | A/G               | missing!              |
| G/G                 | C/T              | C/C              | A/G               | missing!              |
| G/G                 | C/C              | T/C              | G/G               | missing!              |
| G/G                 | C/T              | T/T              | A/G               | missing!              |
| A/G                 | C/C              | T/C              | A/A               | missing!              |
| G/G                 | C/T              | T/C              | A/G               | 72.00                 |
| G/G                 | C/C              | T/T              | A/G               | missing!              |
| G/G                 | C/C              | T/T              | A/A               | missing!              |
| G/G                 | C/T              | T/C              | A/G               | missing!              |
| A/G                 | C/C              | C/C              | G/G               | missing!              |
| G/G                 | C/C              | T/T              | G/G               | missing!              |

| rs2297518<br>(iNOS) | rs3448<br>(GPX1) | rs4673<br>(CYBA) | rs4880<br>(MnSOD) | Survival<br>in months |
|---------------------|------------------|------------------|-------------------|-----------------------|
| A/G                 | C/C              | C/C              | G/G               | missing!              |
| UND                 | C/C              | T/T              | A/A               | missing!              |
| A/G                 | C/T              | T/C              | A/G               | missing!              |
| A/G                 | C/T              | T/T              | A/G               | missing!              |
| G/G                 | C/C              | T/C              | A/G               | missing!              |
| G/G                 | C/C              | T/C              | G/G               | missing!              |
| G/G                 | C/T              | C/C              | G/G               | missing!              |
| G/G                 | T/T              | T/T              | G/G               | missing!              |
| G/G                 | C/T              | T/C              | A/G               | missing!              |
| A/G                 | C/T              | T/T              | G/G               | missing!              |
| A/G                 | C/T              | T/C              | A/G               | missing!              |
| G/G                 | C/T              | C/C              | A/G               | 36.00                 |
| G/G                 | C/C              | A/A              | C/C               | missing!              |
| G/G                 | C/C              | A/G              | T/T               | missing!              |
| G/G                 | C/T              | A/G              | T/C               | missing!              |
| G/G                 | C/C              | A/G              | T/C               | missing!              |
| G/G                 | C/T              | A/G              | T/C               | missing!              |
| G/G                 | C/T              | A/G              | T/C               | missing!              |
| A/G                 | T/T              | G/G              | C/C               | missing!              |
| G/G                 | C/C              | G/G              | T/T               | missing!              |
| A/G                 | C/C              | A/G              | C/C               | missing!              |
| A/G                 | C/C              | G/G              | T/T               | missing!              |
